# Supplementary material
Source: PubMed Central journal article supplement (PMC4079382)
Supplement: supp_tpc.113.120600_tpc120600_Supplemental.pdf [file supp_tpc.113.120600_tpc120600_Supplemental.pdf]

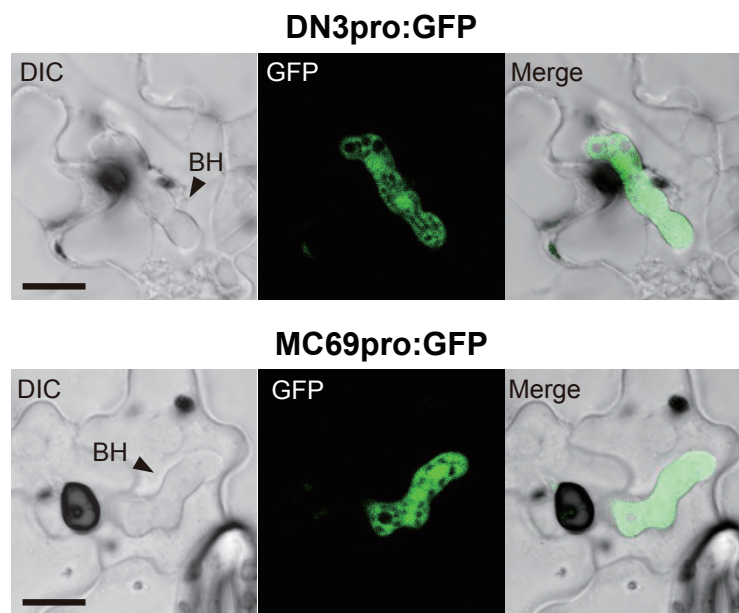

**Supplemental Figure 1.** Gene expression of *DN3* and *MC69* in biotrophic hyphae. *C. orbiculare* strains carrying the GFP gene with the *DN3* or *MC69* promoter were incubated on cucumber for 3 days. The GFP-based promoter analysis suggests that both *DN3* and *MC69* are highly expressed at early biotrophy. BH, biotrophic hypha. Bars = 10  $\mu$ m.

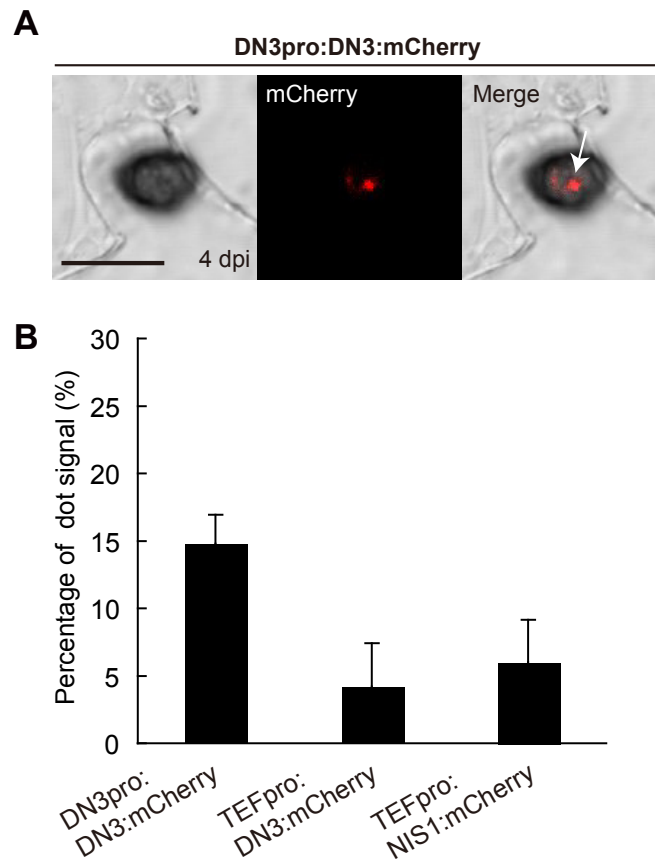

**Supplemental Figure 2.** The DN3:mCherry signal was detected frequently as a dot signal at the bases of *C. orbiculare* appressoria before invasion.

**(A)** Focal accumulation of DN3:mCherry in the basal region of appressoria. *C. orbiculare* strain with DN3pro:DN3:mCherry was inoculated on cucumber cotyledons and the inoculated plants were observed at 4 dpi. The DN3:mCherry signal was detected frequently as a dot signal at the bases of appressoria that did not develop biotrophic invasive hyphae (represented by an arrow). Bar = 10  $\mu$ m.

**(B)** Quantification of effector dot signals at the appressoria bases of *C. orbiculare* with DN3pro:DN3:mCherry, TEFpro:DN3:mCherry, or TEFpro:NIS1:mCherry. Each strain was incubated on cucumber for 4 days. At least 50 appressoria without biotrophic hyphae were investigated in each plant sample. The mean and SD were calculated from three independent plant samples.

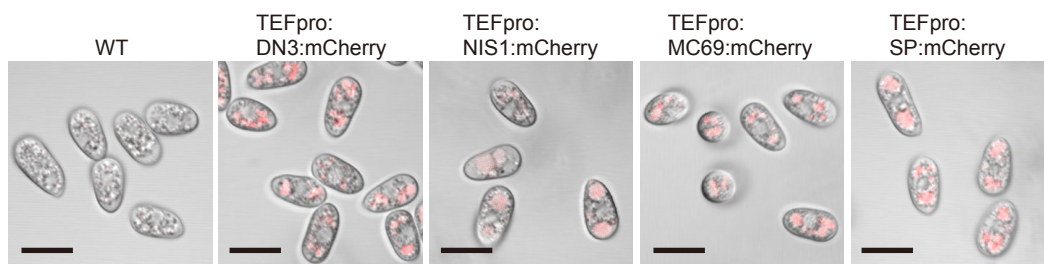

**Supplemental Figure 3.** The mCherry fluorescence in pre-incubated conidia of the wild type and each reporter strain. mCherry fluorescence is equally detected in conidia of all tested reporter strains. Bars = 10  $\mu$ m.

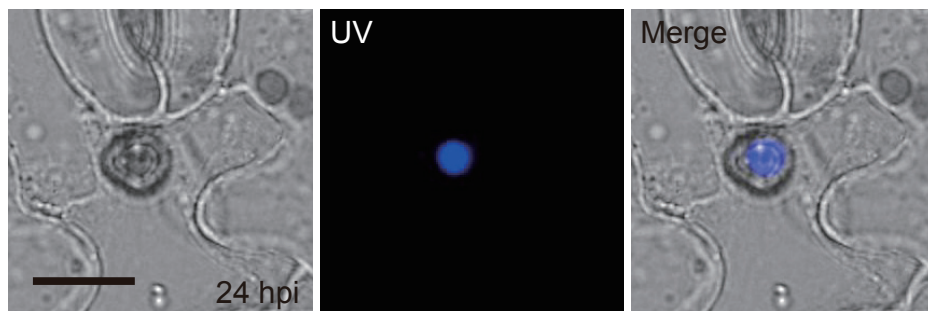

**Supplemental Figure 4.** Typical deposition of papillary callose beneath the melanized appressorium.

*C. orbiculare* strain carrying the TEFpro:DN3:mCherry gene cassette were incubated for 24 h on cucumber. The infected cucumber samples were treated with aniline blue fluorochrome for 20 min before UV excitation. Bar = 10  $\mu$ m.

```

Co-NLP1      1  ----MAPSLFRIATWLAAAVSTVSAAPIQPRAVIAHDAVVGFPETVPSGIIGDLYLKYKP
Ch-NLP1      1  ----MAPSLFRIASWLAAAAAGTVLAAPVERRRGVIDHDAVVGFKETVPSGTVGNLYLKYKP
Co-NLP2      1  ---MRSSGFVPLVLWAGSVLAARTENILNRRGTVPHDSLTPSAQKVQDNDVGRAIDRFNP
Co-NLP3      1  MLAKRFAFCFAAVGSAASSVLTPRGGDTAVGNHWTDHDKVTPLPELPDDGLLGQLEKRFSP

Co-NLP1      57  YLKIVNGCVPFPFAVNSAGDTSGGLSPTGSSNGGCSST--GOVYARGASFNGRYAIMYSW
Ch-NLP1      57  YLKVVNGCVPFPFAVDAAGNTGAGLKPTGSSNGGCSST--GOVYARGAAYNGAYAIMYSY
Co-NLP2      58  LLHIAHGCQPVTAVNDAGDTSGGLKPSGKSDGGCKDTSK-GOTYARAAAQGDKLAIMYAW
Co-NLP3      61  ILYAYQGCIPYAAVNSDGYAGGGLRPTGDTGGDCRDFSQTGOLYATVGKSHGRWAVLSY

Co-NLP1      115  YMPKDSPSTGLG---HRHEWESVVVWISDAT-----ASATILGVAVS-----
Ch-NLP1      115  YMPKDSPATGLG---HTHDWENIVVWLSAAS-----ESATVLLGVSVS-----
Co-NLP2      117  YFPKDQPIDEVGKGSHRHDWEGIVVFLDNLTD----PNPGIVGGAAS-----
Co-NLP3      121  YLPKVHG---PAEQHRHHWLSLVVWLSITKCPAKAENAKILATSFSSTAPGEFVRRIDTI

Co-NLP1      154  -----GHGSYETKTSGISYTGSTHPRVGYRSIFPVNHQMIFTS
Ch-NLP1      154  -----AHGNYDKKTSGISYTSTHPRVGYRSIFPVNHQMIFTS
Co-NLP2      160  -----GHGLFKKTTAPQ--REGDRVKVEYFTQVLFNHELQFTN
Co-NLP3      177  FTTALGGNSSGPRTHPVVRYDGGQPLLPSPFAPEAFRFDDDPEVEVEDPPRRLAGAASGQ

Co-NLP1      192  GGGGQQPLVAWESLTDAARTALQNTNFVDANVPMKDGNFNDNLGKAAL----
Ch-NLP1      192  DGGGQQPVIAWESLPAAARTALENTDFGSANVPMKEGNFVNNLGKAAL----
Co-NLP2      196  TTGRVPPVLDWDAMQPAMQEGLTKTNFGSANVPPKDGNFESNLEKAAL----
Co-NLP3      237  TDPLAPPLVGWEKLPPLVKEQFNGIQYEHTKVPFSANNVQYLDAAYADHIF

```

**Supplemental Figure 5.** Amino acid sequence alignment of three NLP homologs of *C. orbiculare* and Ch-NLP1 of *C. higginsianum*.

Sequence data of each NLP homologs can be found in the GenBank/EMBL data libraries under accession numbers ENH78932.1 (Cob\_11657) for Co-NLP1, ENH81601.1 (Cob\_09815) for Co-NLP2, ENH81388.1 (Cob\_00931) for Co-NLP3, and CCF46728.1 (CH063\_15391) for Ch-NLP1. Amino acid sequences were aligned using the ClustalW program (Thompson et al., 1994). Amino acids identical to *C. orbiculare* Co-NLP1 are indicated as white letters on black ground; similar residues are indicated on gray background; and gaps introduced for alignments are indicated by hyphens.

|       |    |     |                                  |                                               |                             |
|-------|----|-----|----------------------------------|-----------------------------------------------|-----------------------------|
|       | Co | 1   | -----MSSNRNYD                    | FLIKLLIGDSGVGKSCCLLRFSEDSFTPSFITTTIGIDFKIRTI  | ELDGRVKLQIWDTAGOERFRTITAYY  |
|       | Mo | 1   | -----MANRNYDVL                   | IKLLIGDSGVGKSCCLLRFSEDSFTPSFITTTIGIDFKIRTI    | ELDGRVKLQIWDTAGOERFRTITAYY  |
|       | Sc | 1   | MSGLRTVSASSNGKSYD                | SIMKLLIGDSGVGKSCCLLRFVDFEDKFPNPSFITTTIGIDFKIR | TDINGKVKLQIWDTAGOERFRTITAYY |
| SEC4  | Co | 81  | RGAMGILLVYDVTDERSFNNIRTWFANVEQHA | TEGVNKNILIGNKCDWEEKRVVSTER                    | QOALADELGI                  |
|       | Mo | 80  | RGAMGILLVYDVTDERSFNNIRTWFANVEQHA | SEGVNKNILIGNKCDWEEKRVVSTER                    | QOALADELGI                  |
|       | Sc | 91  | RGAMGILLVYDVTDERSFNNIRTWFANVEQHA | SEGVNKNILIGNKCDWEEKRVVSTER                    | QOALADELGI                  |
|       | Co | 171 | IKKRLIDNQKNEQPAASG               | -----VNVGESSGSGGKCC                           |                             |
|       | Mo | 170 | IKKRLIDNQKDFQNP                  | GSVNVNAGAQNSAGGMGKCC                          |                             |
|       | Sc | 180 | IQEKIDSNKLVGVGNGKEGNISIN         | SGSNGSSKSNCC                                  |                             |
|       | Co | 1   | MIRSTQIARLDGLMCLCASVDD           | EQEPAALAEVKSQIKQLRKLTRN                       | SEPOASIESG-SYNLHYLIDSDIT    |
|       | Mo | 1   | MIRSTQIARLDGLMCLCASVDD           | EADSDALAEVKSQIKQLRKLTRN                       | SEPOASIESG-SYNLHYLIDSDIT    |
|       | Sc | 1   | MIRSTQIARLDGLMCLCASVDD           | EADSDALAEVKSQIKQLRKLTRN                       | SEPOASIESG-SYNLHYLIDSDIT    |
| SEC22 | Co | 90  | AREFTQTVPAEQHSPALRPYAFMEFDTF     | TSRTRKSTYS                                    | DARASQNLKDELDRDVT           |
|       | Mo | 91  | AREFTQTVPAEQHSPALRPYAFMEFDTF     | TSRTRKSTYS                                    | DARASQNLKDELDRDVT           |
|       | Sc | 89  | AREFTQTVPAEQHSPALRPYAFMEFDTF     | TSRTRKSTYS                                    | DARASQNLKDELDRDVT           |
|       | Co | 180 | YRRAAVRINWELLKQYGPFAVLGFI        | ITIVFFWRRFF                                   |                             |
|       | Mo | 181 | YRRAAVRINWELLKQYGPFAVLGFI        | ITIVFFWRRFF                                   |                             |
|       | Sc | 178 | YRRAAVRINWELLKQYGPFAVLGFI        | ITIVFFWRRFF                                   |                             |
|       | Co | 1   | MSVGSMTSHHADEEARAEVDV            | LNSRLERTAQLTKKIQSCMGR                         | LETTGKSVREVAGPLSGETK        |
|       | Mo | 1   | MSVGSMTSHHADEEARAEVDV            | LNSRLERTAQLTKKIQSCMGR                         | LETTGKSVREVAGPLSGETK        |
|       | Sc | 1   | MSVGSMTSHHADEEARAEVDV            | LNSRLERTAQLTKKIQSCMGR                         | LETTGKSVREVAGPLSGETK        |
|       | Co | 91  | DEEQIIRAGPDKCGLSNYLS             | SIKRISSRFTIEMONS                              | NLRANQO-----TMAELVR         |
|       | Mo | 91  | DEEQIIRAGPDKCGLSNYLS             | SIKRISSRFTIEMONS                              | NLRANQO-----TMAELVR         |
|       | Sc | 83  | DEEQIIRAGPDKCGLSNYLS             | SIKRISSRFTIEMONS                              | NLRANQO-----TMAELVR         |
|       | Co | 176 | FPVLSQDKVARLGLINSYIAS            | NHRONGGASPOSS                                 | TAKIYAEIRGPYLSSTLVN         |
|       | Mo | 176 | FPVLSQDKVARLGLINSYIAS            | NHRONGGASPOSS                                 | TAKIYAEIRGPYLSSTLVN         |
|       | Sc | 171 | FPVLSQDKVARLGLINSYIAS            | NHRONGGASPOSS                                 | TAKIYAEIRGPYLSSTLVN         |
|       | Co | 266 | FAEYDNICISIFTR                   | --EDWGPLFOATCHAA                              | TAEALARTLRELNHHIKAH         |
|       | Mo | 264 | FAEYDNICISIFTR                   | --EDWGPLFOATCHAA                              | TAEALARTLRELNHHIKAH         |
|       | Sc | 250 | FAEYDNICISIFTR                   | --EDWGPLFOATCHAA                              | TAEALARTLRELNHHIKAH         |
| EXO70 | Co | 354 | TAKLSLGELEDTRKRVANM              | QSTPADGAPSPVIAETMOR                           | LQTMVEFLRPSINIMFSL          |
|       | Mo | 348 | TAKLSLGELEDTRKRVANM              | QSTPADGAPSPVIAETMOR                           | LQTMVEFLRPSINIMFSL          |
|       | Sc | 340 | TAKLSLGELEDTRKRVANM              | QSTPADGAPSPVIAETMOR                           | LQTMVEFLRPSINIMFSL          |
|       | Co | 444 | IFAHYCADVETILLSS                 | LDKAKMVFK-----G                               | GRAVMGVFMANNVVIT            |
|       | Mo | 437 | IFAHYCADVETILLSS                 | LDKAKMVFK-----G                               | GRAVMGVFMANNVVIT            |
|       | Sc | 426 | IFAHYCADVETILLSS                 | LDKAKMVFK-----G                               | GRAVMGVFMANNVVIT            |
|       | Co | 518 | TECKEVS                          | AHLFDVIHTSKQRPTSG                             | ---QADSASILKGLSSRD          |
|       | Mo | 510 | TECKEVS                          | AHLFDVIHTSKQRPTSG                             | ---QADSASILKGLSSRD          |
|       | Sc | 516 | TECKEVS                          | AHLFDVIHTSKQRPTSG                             | ---QADSASILKGLSSRD          |
|       | Co | 604 | YVRFWDYHEVDK                     | KGKGVKVDKGTGIAAV                              | FTTFL-                      |
|       | Mo | 599 | YVRFWDYHEVDK                     | KGKGVKVDKGTGIAAV                              | FTTFL-                      |
|       | Sc | 589 | YVRFWDYHEVDK                     | KGKGVKVDKGTGIAAV                              | FTTFL-                      |
|       | Co | 1   | MKEEVAALVIDNGSMCK                | KAGFAGDDAPRAVFP                               | SVIGRPRHHGIMIGMQKDS         |
|       | Mo | 1   | MKEEVAALVIDNGSMCK                | KAGFAGDDAPRAVFP                               | SVIGRPRHHGIMIGMQKDS         |
|       | Sc | 1   | MKEEVAALVIDNGSMCK                | KAGFAGDDAPRAVFP                               | SVIGRPRHHGIMIGMQKDS         |
|       | Co | 91  | YNELRVAP                         | EEHPVLLTEAPINPKSN                             | REKMTQIVFETFNAPAFV          |
|       | Mo | 91  | YNELRVAP                         | EEHPVLLTEAPINPKSN                             | REKMTQIVFETFNAPAFV          |
|       | Sc | 91  | YNELRVAP                         | EEHPVLLTEAPINPKSN                             | REKMTQIVFETFNAPAFV          |
| actin | Co | 181 | AGRDLTDYLMKILA                   | ERGYSFSTTAEREIV                               | DIKEKLCYVALDFEQE            |
|       | Mo | 181 | AGRDLTDYLMKILA                   | ERGYSFSTTAEREIV                               | DIKEKLCYVALDFEQE            |
|       | Sc | 181 | AGRDLTDYLMKILA                   | ERGYSFSTTAEREIV                               | DIKEKLCYVALDFEQE            |
|       | Co | 271 | SGGIHVT                          | FNFSIMKSDVDVRK                                | DLYGNIVMSGGTTMP             |
|       | Mo | 271 | SGGIHVT                          | FNFSIMKSDVDVRK                                | DLYGNIVMSGGTTMP             |
|       | Sc | 271 | SGGIHVT                          | FNFSIMKSDVDVRK                                | DLYGNIVMSGGTTMP             |
|       | Co | 361 | EYDESGPS                         | IVHRCF                                        |                             |
|       | Mo | 361 | EYDESGPS                         | IVHRCF                                        |                             |
|       | Sc | 361 | EYDESGPS                         | IVHRCF                                        |                             |

**Supplemental Figure 6.** Amino acid sequence alignments of SEC4, SEC22, EXO70, and actin orthologs of *C. orbiculare* with corresponding orthologs of other organisms. The SEC4, SEC22, EXO70, and actin orthologs of *C. orbiculare* (Co) were aligned with the corresponding orthologs of *M. oryzae* (Mo) and *S. cerevisiae* (Sc). Amino acid sequences were aligned using the ClustalW program (Thompson et al., 1994). Amino acids identical to each *C. orbiculare* ortholog are indicated as white letters on black ground; similar residues are indicated on gray background; and gaps introduced for alignments are indicated by hyphens. Each ortholog sequence data can be found in the GenBank/EMBL data libraries under accession numbers EHA52200 (Mo-SEC4), DAA12434 (Sc-SEC4), EHA47424 (Mo-SEC22), DAA09582 (Sc-SEC22), EHA54952 (Mo-EXO70), DAA08714 (Sc-EXO70), EHA47504 (Mo-actin), DAA12401 (Sc-actin).

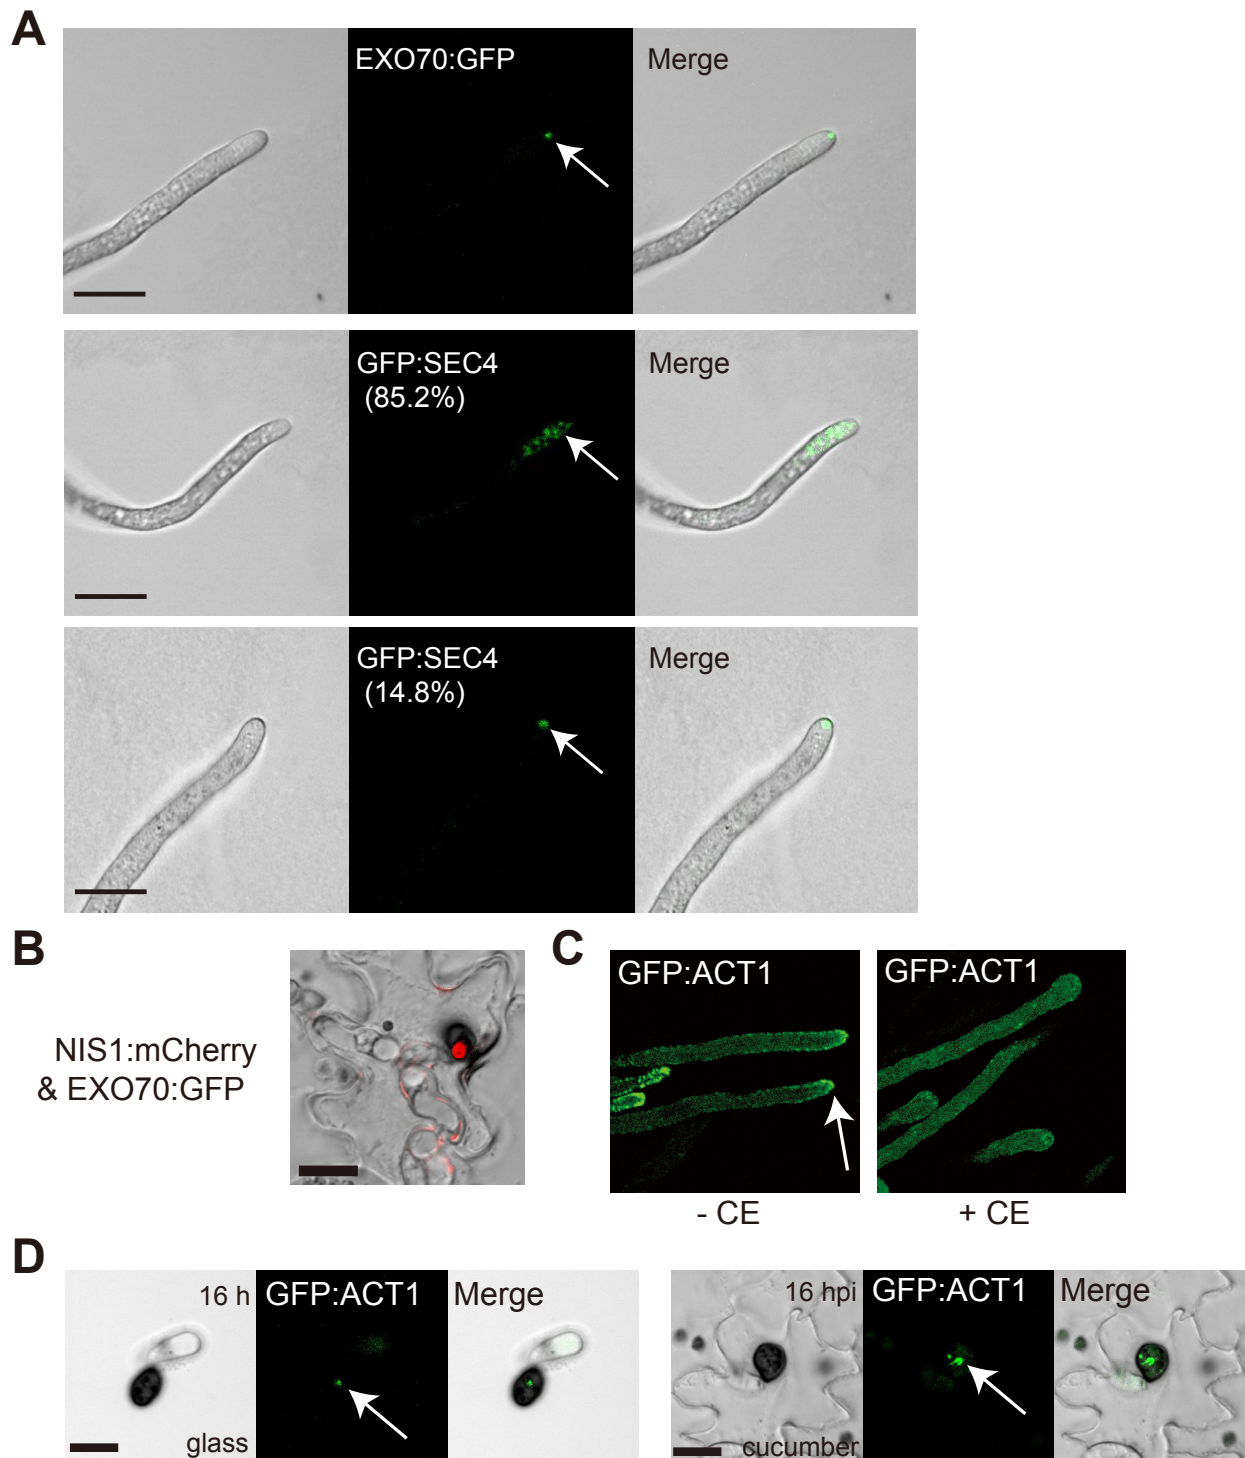

**Supplemental Figure 7.** Localization of exocytosis-related components and actin in vegetative hyphae and appressoria.

**(A)** Apical localization patterns of EXO70 and SEC4 in vegetative hyphae (white arrows). The vegetative hyphae of each strain carrying SCD1pro:EXO70:GFP or SCD1pro:GFP:SEC4 gene cassette were observed. Bars = 10  $\mu$ m.

**(B)** No fluorescence of EXO70:GFP in the cavity region of effector ring. The strain carrying both SCD1pro:EXO70:GFP and TEFpro:NIS1:mCherry was inoculated onto cucumber cotyledons, and the inoculated plants were analyzed. Bar = 10  $\mu$ m.

**(C)** Apical localization pattern of ACT1 (actin) in vegetative hyphae (white arrow). The vegetative hyphae of the strain with SCD1pro:GFP:ACT1 were observed with or without cytochalasin E (CE).

**(D)** Dot signals of GFP:ACT1 at the bases of appressoria formed on glass and cucumber (white arrows). The *C. orbiculare* strain with SCD1pro:GFP:ACT1 was incubated for 16 h. Bars = 10  $\mu$ m.

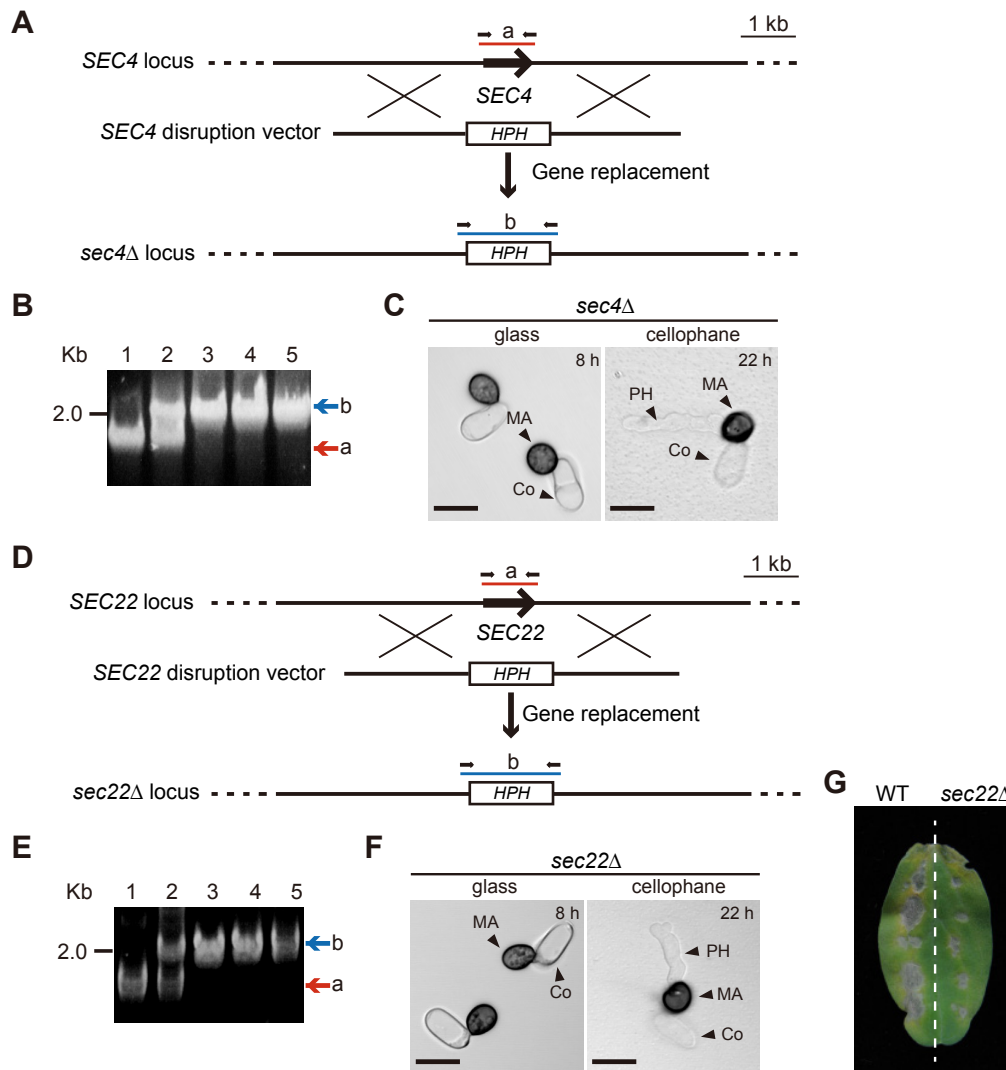

**Supplemental Figure 8.** Gene disruptions of *SEC4* and *SEC22* in *C. orbiculare*.

**(A)** *SEC4* locus of *C. orbiculare* and the *SEC4* gene disruption vector containing a hygromycin phosphotransferase gene (*HPH*) cassette flanked by the border sequences of *SEC4*. The primers used for the genomic PCR are indicated by arrows. The fragments amplified by PCR are indicated by bars (a and b). **(B)** The genomic PCR analysis was performed using DNA isolated from wild-type strain 104-T or strains transformed with the *SEC4* gene disruption vector. A 1.2-kb fragments (a) was amplified from both the wild-type strain (lane 1) and an ectopic transformant (lane 2), whereas a 1.8-kb fragment (b) was amplified from the ectopic transformant (lane 2), the two *sec4Δ* strains (lanes 3 and 4) and the *SEC4* gene disruption vector (lane 5). **(C)** Morphological behaviors of *sec4Δ* strains incubated on glass and cellophane. The *sec4Δ* strains exhibited normal appressorium formation on glass and cellophane, and the appressoria of the mutant developed pseudo-biotrophic hyphae on cellophane. Co, conidium; MA, melanized appressorium; PH, pseudo-biotrophic hypha. Bars = 10  $\mu$ m. **(D)** *SEC22* locus of *C. orbiculare* and *SEC22* gene disruption vector containing the *HPH* cassette flanked by the border sequences of *SEC22*. **(E)** The genomic PCR analysis was performed using DNA isolated from wild-type strain 104-T or strains transformed with the *SEC22* gene disruption vector. A 1.2-kb fragments (a) was amplified from both the wild-type strain (lane 1) and an ectopic transformant (lane 2), whereas a 1.8-kb fragment (b) was amplified from the ectopic transformant (lane 2), the two *sec22Δ* strains (lanes 3 and 4) and the *SEC22* gene disruption vector (lane 5). **(F)** Morphological behaviors of *sec22Δ* strains incubated on glass and cellophane. *sec22Δ* strains exhibited normal appressorium formation on glass and cellophane, and the appressoria of the mutant developed pseudo-biotrophic hyphae on cellophane. Co, conidium; MA, melanized appressorium; PH, pseudo-biotrophic hypha. Bars = 10  $\mu$ m. **(G)** The *sec22Δ* strain developed lesions on cucumber cotyledons treated with heat shock. For the heat shock treatment, the detached cucumber cotyledons were immersed in distilled water at 50°C for 50s, and then they were subjected to the inoculation assay. WT, the wild-type strain.



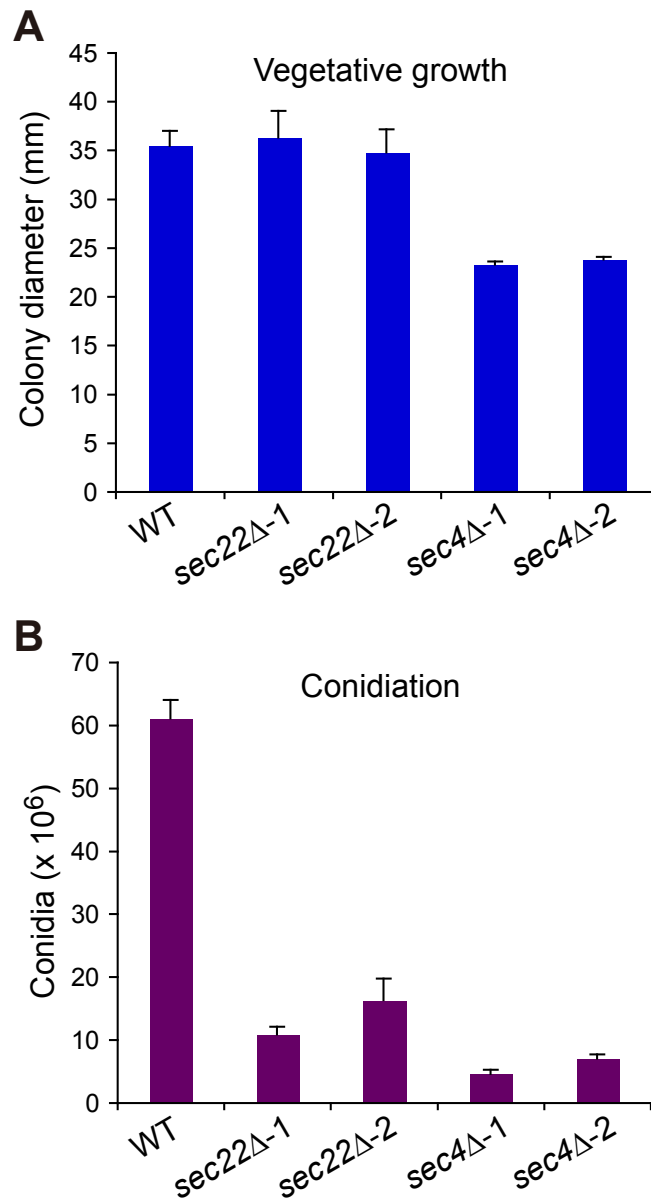

**Supplemental Figure 9.** Vegetative growth and conidiation of *sec4Δ* and *sec22Δ* mutants.

**(A)** Colony diameter of each strain grown on PDA for 7 days was measured. The means and standard deviations were calculated from three independent experiments.

**(B)** Conidia of each strain were harvested from colonies grown on PDA medium for 7 days. Numbers of conidia were counted. The means and standard deviations were calculated from three independent experiments.

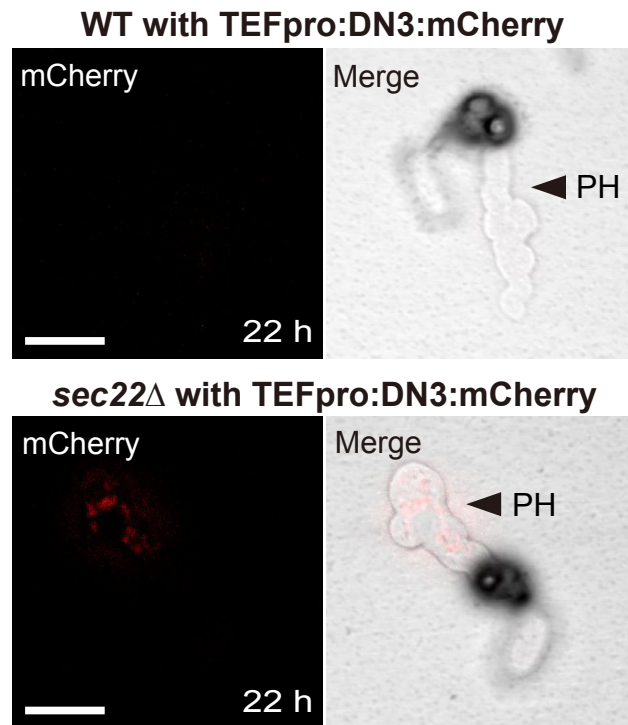

**Supplemental Figure 10.** The retention of the effector:mCherry signal inside pseudo-biotrophic hyphae developed in cellophane. WT and *sec22*Δ strains with TEFpro:DN3:mCherry were incubated on cellophane for 22 h. PH, pseudo-biotrophic hypha. Bars = 10 μm.

**Supplemental Table 1.** Primers used in this study

| Name                        | Sequence                                                                          | destination                                          |
|-----------------------------|-----------------------------------------------------------------------------------|------------------------------------------------------|
| CoDN3pro-NotI-f             | 5'-ATAAGAATGCGGCCGCTAGCCGCTTCAGCGTCAGTC-3'                                        | DN3pro:DN3:mCherry, DN3pro:GFP, DN3pro:SP:mCherry    |
| CoDN3-XhoI-r(c)             | 5'-CCGCTCGAGAGGTCCTTTTCCCGGAG-3'                                                  | DN3pro:DN3:mCherry, TEFpro:DN3:mCherry               |
| CoDN3pro-XbaI-r(c)          | 5'-GCTCTAGAGGTGAATGGGAGGCGTCTGC-3'                                                | DN3pro:GFP, DN3pro:SP:mCherry                        |
| CoNIS1pro-NotI-f            | 5'-ATAAGAATGCGGCCGCATAGAATGAGTTTCGTATTG-3'                                        | NIS1pro:NIS1:mCherry                                 |
| CoNIS1-XhoI-r(c)            | 5'-CCGCTCGAGGATTTCCCTCGGTACCCG-3'                                                 | NIS1pro:NIS1:mCherry                                 |
| CoMC69pro-NotI-f            | 5'-ATAAGAATGCGGCCGCGTCTTCGTCTTTTCGGTCT-3'                                         | MC69pro:MC69:mCherry                                 |
| CoMC69-XhoI-r(c)            | 5'-CCGCTCGAGTGACTTTCTCAGAGGACTACAG-3'                                             | MC69pro:MC69:mCherry, TEFpro:MC69:mCherry            |
| CoNLP1pro-NotI-f            | 5'-ATAAGAATGCGGCCGCGTGTTCGAGACAGCAAAGAGCGG-3'                                     | NLP1pro:GFP                                          |
| CoNLP1pro-XbaI-r(c)         | 5'-GCTCTAGATGTCTGTGTAAGGACCTTTTGGGTTCTGCC-3'                                      | NLP1pro:GFP                                          |
| mCherry-BamHI-BglIII-XhoI-f | 5'-GAGAGGAGAAGGATCCAGATCTCTCGAGACCATGGTGAGCAAGGGCGAGGAG-3'                        | Effector:mCherry constructs (for <i>XhoI</i> joint)  |
| mCherry-EcoR I-r(c)         | 5'-CGGAATTCCTTACTTGTACAGCTCGTCCATGCC-3'                                           | Effector:mCherry constructs, SP:mCherry constructs   |
| SPcodn3A-mCherry-XbaI-f     | 5'-GCTCTAGAATGTACGCCCTCAAGCTTCGTCGTATGCTCGTATCCCTTTGGCGGTGCAGTGAGCAAGGGCGAGGAG-3' | SP:mCherry constructs                                |
| CoDN3-XbaI-f                | 5'-GCTCTAGACAGACACAATGTACGCCCTCAAGCTTCGTCG-3'                                     | TEFpro:DN3:mCherry                                   |
| CoNIS1-XbaI-f               | 5'-GCTCTAGAATGCAGTTCCTCACCTCCCTC-3'                                               | TEFpro:NIS1:mCherry                                  |
| CoNIS1-BamH I-r(c)          | 5'-CGGGAATTCCTTACTTGTACAGCTCGTCCATGCC-3'                                          | TEFpro:NIS1:mCherry                                  |
| CoMC69-XbaI-f               | 5'-GCTCTAGAATGAAGTTTACACTCGTCTCC-3'                                               | TEFpro:MC69:mCherry                                  |
| mCherry-BamHI-f             | 5'-GGGATCCATGGTGAGCAAGGGCGAGGAGGATAAC-3'                                          | Effector:mCherry constructs (for <i>BamHI</i> joint) |
| NIS1ORFKsI                  | 5'-GCCCTCTAGACAGACACAATGCAGTTCCTCACCTCCCTCG-3'                                    | TEFpro:NIS1:GFP                                      |
| NIS1GFPprev                 | 5'-GCCCTCTAGACCTCCACCACCACCGATTTTCTCTCGGTACCCGC-3'                                | TEFpro:NIS1:GFP                                      |
| eGFP-EcoRV-f                | 5'-CCGATATCATGGTGAGCAAGGGCGAGGAG-3'                                               | pBAT-eGFP, pHYPT-eGFP                                |
| eGFP-HindIII-r(c)           | 5'-CCCAAGCTTTTACTTGTACAGCTCGTCCATGC-3'                                            | pBAT-eGFP, pHYPT-eGFP                                |
| CoExo70-BamHI-f             | 5'-CGGATCCATGTCTGGTCCGCTCAATGACCAGTC-3'                                           | SCD1pro:EXO70:GFP                                    |
| CoExo70-PstI-r(c)           | 5'-CATTGGTTCTGCAGACCACCACCAAAATAGGGTCGTAACACGGCGG-3'                              | SCD1pro:EXO70:GFP                                    |
| CoSEC4-BamHI-f              | 5'-CGGATCCCGGGTGGTATGTCGAGCAACCGCAACTACGACTTTC-3'                                 | SCD1pro:GFP:SEC4                                     |
| CoSEC4-PstI-r(c)            | 5'-CATTGGTTCTGCAGTTAACAGCACTTCCGCCGATCCGC-3'                                      | SCD1pro:GFP:SEC4                                     |
| SEC22SB1                    | 5'-CGGATCCCGGGTGGTATGATTGCTCAACGCAAATAGCAAGG-3'                                   | SCD1pro:GFP:SEC22                                    |
| SEC22ASB1                   | 5'-CGGATCCCTCAAAGAAGCGCCACCCAGAAAAACAC-3'                                         | SCD1pro:GFP:SEC22                                    |
| A7ACT1B                     | 5'-CGGATCCCGGGTGGTATGATTGCTCAACGCAAATAGCAAGG-3'                                   | SCD1pro:GFP:ACT1                                     |
| A7ACT1E                     | 5'-CGGCGGAATCTTGAAGCACTTGGGTGAAC-3'                                               | SCD1pro:GFP:ACT1                                     |
| Sec4-3UTR-SA1               | 5'-GAAGGGCCAGCAAAGGGTCTTTGGTTGATAC-3'                                             | <i>SEC4</i> gene disruption                          |
| Sec4-3UTR-ASK1              | 5'-GGGGTACCACATCAGAAAGAGACTAAGAAGTGG-3'                                           | <i>SEC4</i> gene disruption                          |
| Sec4-5UTR-SB1               | 5'-CGGATCCAAGAGCTTGTCTTTGGCTTCGTTG-3'                                             | <i>SEC4</i> gene disruption                          |
| Sec4-5UTR-ASE1              | 5'-CGGAATCTTTTCAGAGAGGAAATGGGTATTC-3'                                             | <i>SEC4</i> gene disruption                          |
| CoSEC4OUTS                  | 5'-CGACGACGACATCGCGATAC-3'                                                        | Confirmation of <i>SEC4</i> gene disruption          |
| CoSEC4OUTAS                 | 5'-CGTGGTCTCGAAAGTGCAAATC-3'                                                      | Confirmation of <i>SEC4</i> gene disruption          |
| Sec22-5UTRNS1               | 5'-ATAAGAATGCGGCCGCCTCTGCGTAAGGCCATGGTCGAC-3'                                     | <i>SEC22</i> gene disruption                         |
| Sec22-5UTRASE1              | 5'-CGGAATTCGAGTGTCTTGGTGTTCGTTGGCG-3'                                             | <i>SEC22</i> gene disruption                         |
| Sec22-3UTRSA1               | 5'-GAAGGGCCCGTGAATATCATAACGCGATCGC-3'                                             | <i>SEC22</i> gene disruption                         |
| Sec22-3UTRASK1              | 5'-GGGTACCACAGTGGAGTTCATACGTCCTCTC-3'                                             | <i>SEC22</i> gene disruption                         |
| Sec22-OUTS                  | 5'-TACCTGCATACCTGGTACG-3'                                                         | Confirmation of <i>SEC22</i> gene disruption         |
| Sec22-OUTAS                 | 5'-TACTCCACAGGCAGATGTC-3'                                                         | Confirmation of <i>SEC22</i> gene disruption         |
| XCNU1                       | 5'-GCTCTAGAATGCAGTTCTCACCTCCCTCG-3'                                               | pCB-Ppw12-NIS1-mCherry-NLS                           |
| BCNL1                       | 5'-CGGATCCGATTTTCTCTCGGTACCCGCC-3'                                                | pCB-Ppw12-NIS1-mCherry-NLS                           |
